# Supplementary material for: TCR meta-clonotypes for biomarker discovery with tcrdist3: identification of public, HLA-restricted SARS-CoV-2 associated TCR features
Source: PubMed Central journal article supplement — bioRxiv. 2021 Mar 19:2020.12.24.424260. Originally published 2020 Dec 26. Preprint. [Version 2] doi: 10.1101/2020.12.24.424260 (PMC7781332; doi:10.1101/2020.12.24.424260), 2021-03-19
Supplement: NIHPP2020.12.24.424260-supplement-1.pdf [file NIHPP2020.12.24.424260-supplement-1.pdf]

## Figure S1

**Figure S1: Publicity analysis in MIRA participants of CD8<sup>+</sup> TCR  $\beta$ -chain features activated by SARS-CoV-2 peptide ORF1ab 4211:4252 (MIRA55) predicted to bind HLA-A\*01. TCR features publicity across individual was determined using two methods for clustering similar TCR sequences: (A) tcrdist3 meta-clonotypes defined by a centroid TCR and all TCRs within an optimized radius chosen to span 1e-6 TCRs in a bulk unenriched TRBV-TRBJ matched background data, and (B) public clonotypes defined by identical TRBV gene usage and identical CDR3, at the amino acid level.**

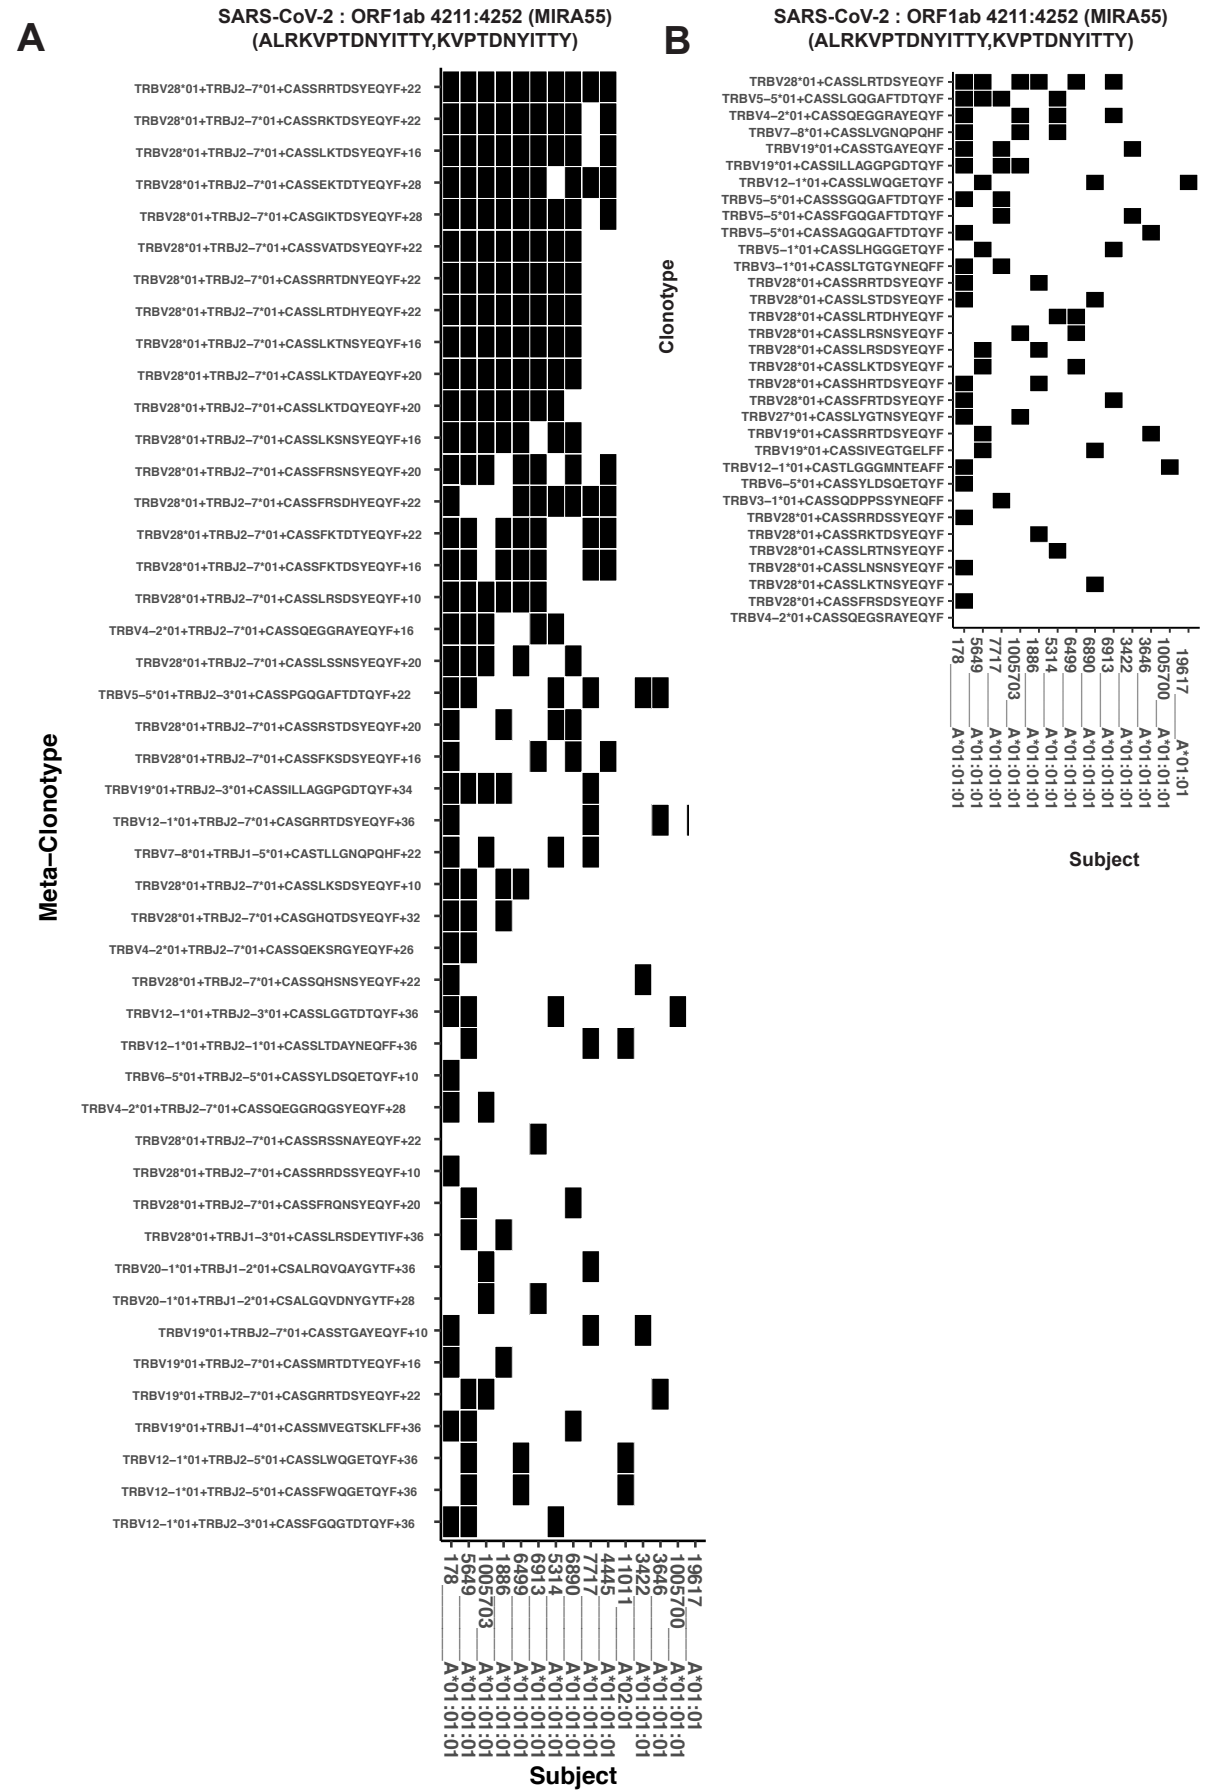

## Figure S2

### SARS-CoV2 : ORF1ab 4211:4252 (M55) (ALRKVPTDNYITTY,KVPTDNYITTY)

**Figure S2: Publicity and breadth analysis of CD8+ TCR  $\beta$ -chain features activated by SARS-CoV-2 peptide ORF1ab 4211:4252 (MIRA55) using tcrdist3 and GLIPH2.** TCR feature publicity was determined using two methods for clustering similar TCR sequences: (A) tcrdist3 meta-clonotypes (with radii based on  $\theta = 1E-6$ ) and (B) GLIPH2-groups, sets of TCRs with a shared CDR3 k-mer pattern uncommon in the default background CD8+ receptor data (using default Fisher's p-value  $< 0.001$ ). Grid fill color shows the breadth of clones clustered. See Methods for details.

**A**

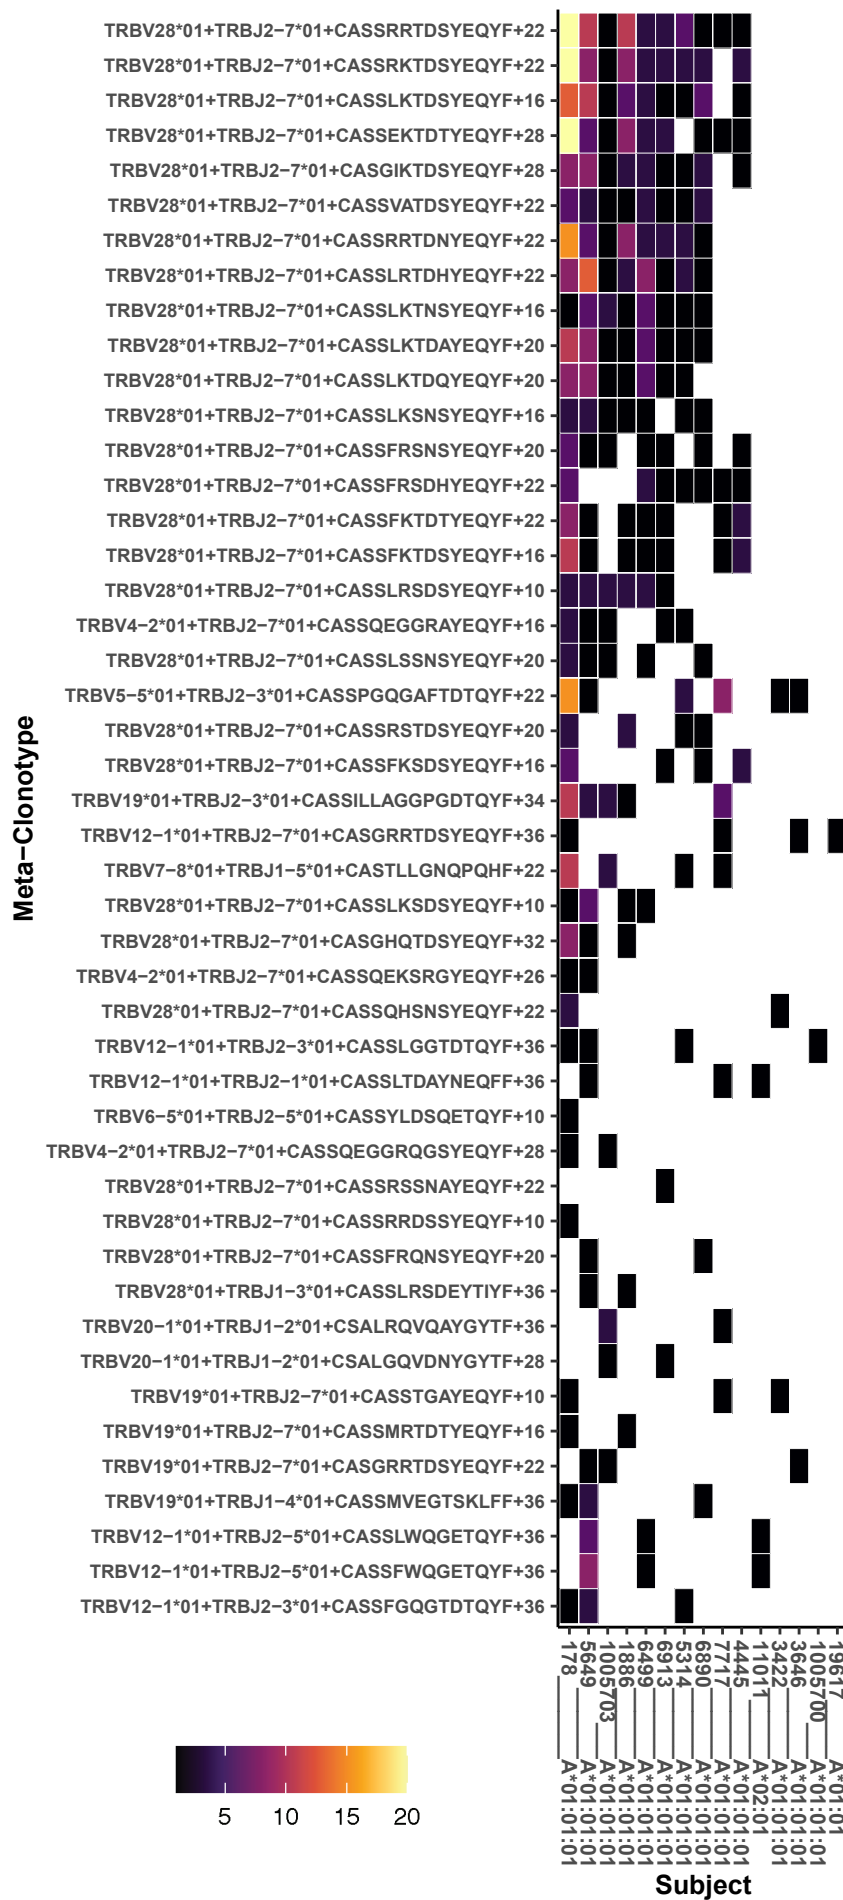

**B**

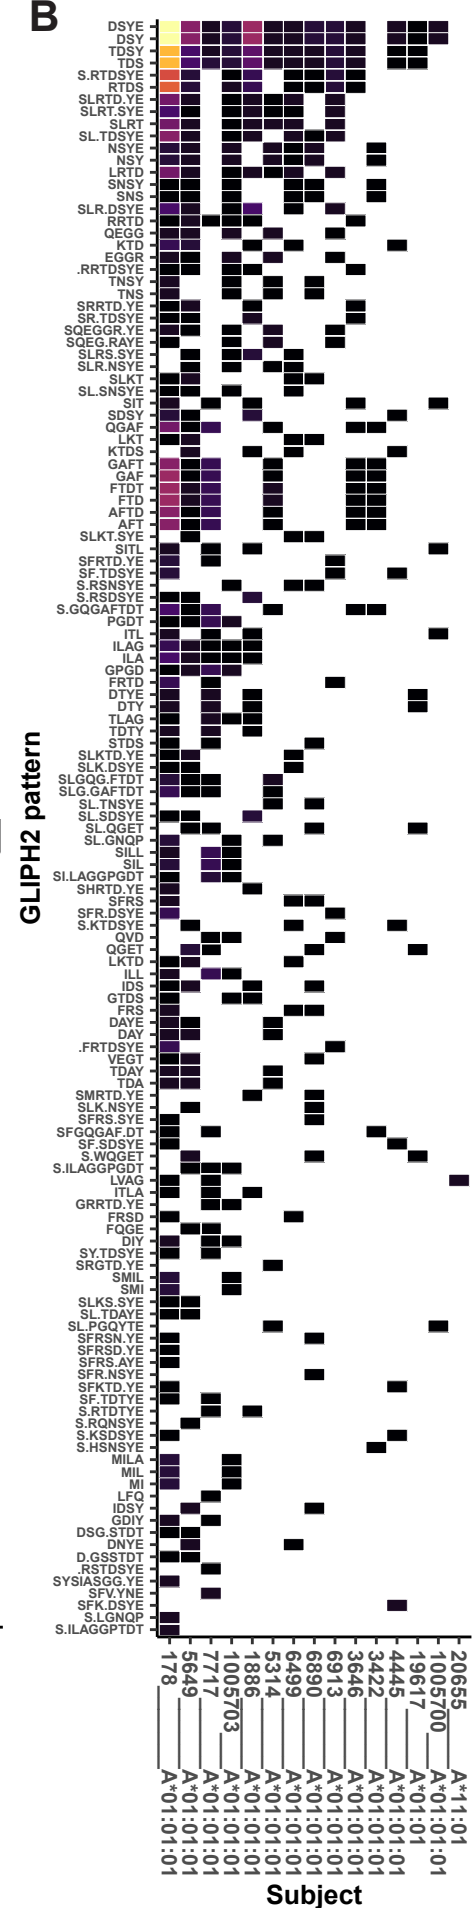

## Figure S3

**Figure S3 : Associations of TCR features with participant age, days-post diagnosis, HLA-type, and sex in bulk TCR  $\beta$ -chain repertoires of COVID-19 patients (n=694).** TCR features shown here were identified from publicity analysis of CD8+ TCRs activated by an illustrative SARS-CoV-2 peptide ORF1ab 4211:4252 (MIRA55), which is predicted to bind HLA-A\*01. Using beta-binomial regression models estimated for each feature, volcano plots show associations between participant characteristics and abundance of TCRs matching either: (A) EXACT clonotypes (TRBV+CDR3), (B) GLIPH2 patterns (TRBV+CDR3 k-mer), or (C) tcridist3 based RADIUS+MOTIF meta-clonotype. See Methods for details.

### A

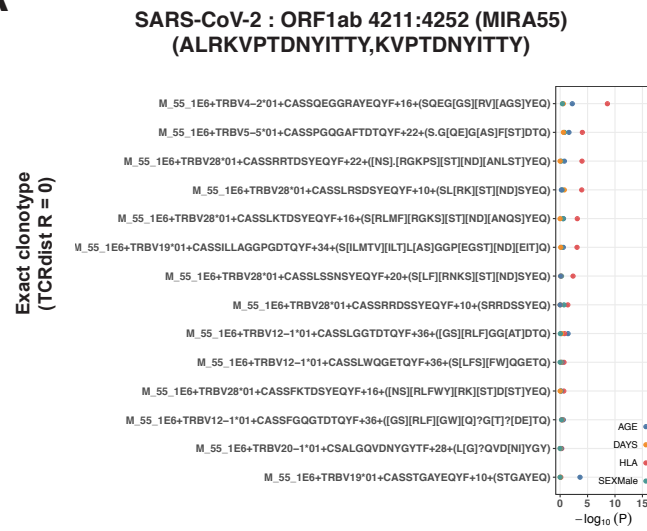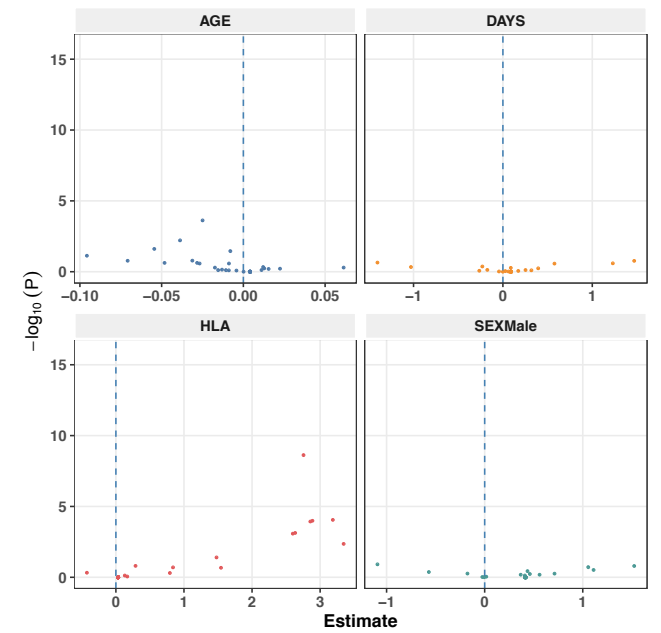

### B

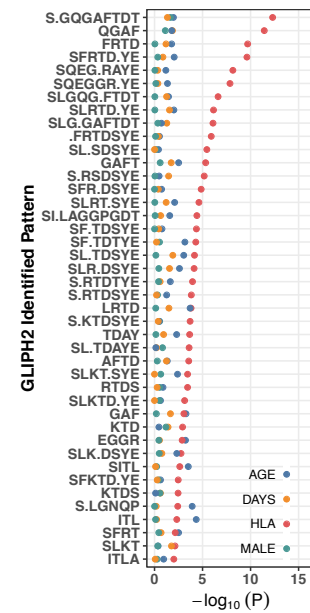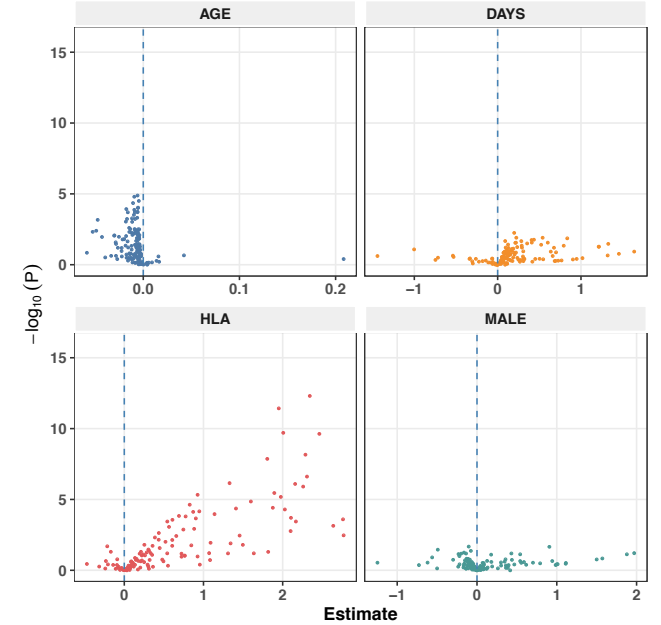

### C

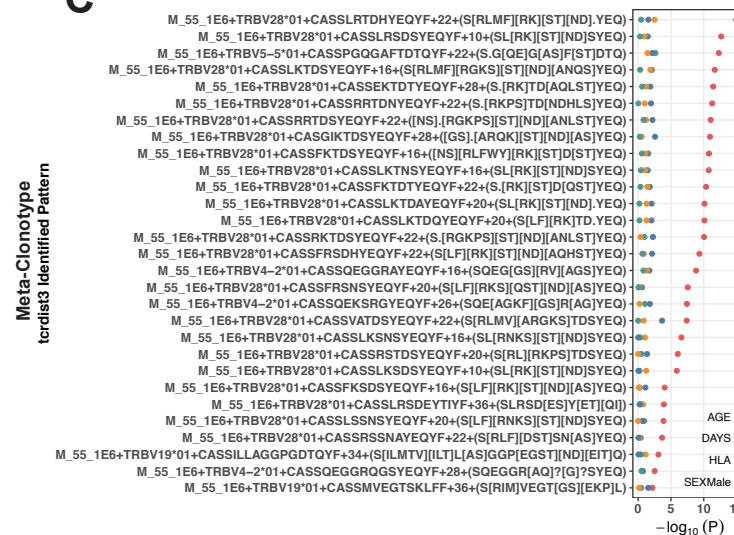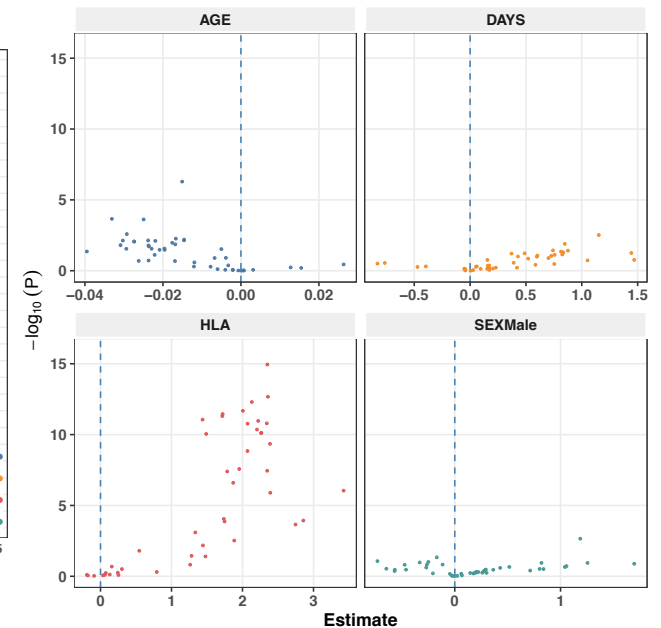

## Figure S4

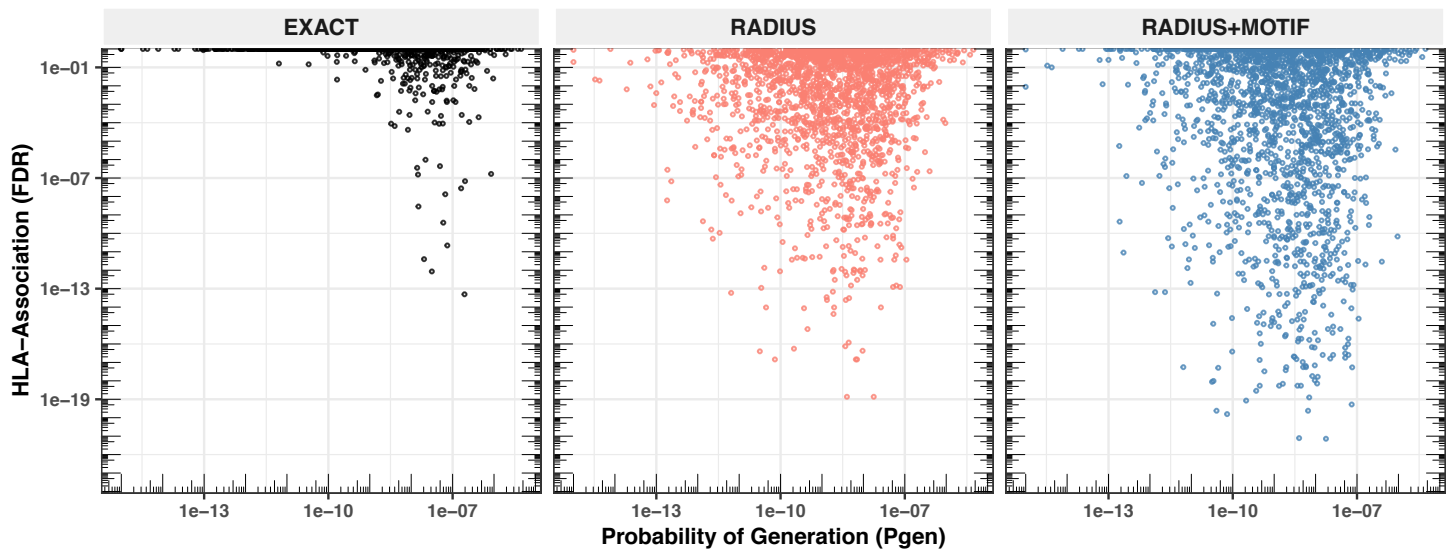

**Figure S4. Detectable HLA-association and CDR3 probability of generation.** We evaluated meta-clonotypes from 18 MIRA sets in a cohort of 694 COVID-19 patients for their association with predicted HLA-restricting alleles. Evidence of the HLA association for each meta-clonotype (RADIUS or RADIUS+MOTIF) and the centroid alone (EXACT) is indicated by the associated false discovery rate adjusted p-value (FDR; y-axis) in beta-binomial regressions (see Methods for model details). The probability of generation (Pgen) of each centroid's CDR3- $\beta$  was estimated using the software OLGA (x-axis). Given the extent of TCR diversity across individuals, population-scale analysis of exact antigen-specific clonotype abundance is likely limited to public (i.e., higher Pgen) TCR features. Using meta-clonotypes, *tcrdist3* revealed strong evidence of HLA-restriction for TCRs with both high and low Pgen.
